# Supplementary material for: Predicting the Adsorption of Amoxicillin and Ibuprofen on Chitosan and Graphene Oxide Materials: A Density Functional Theory Study
Source: MDPI journal article supplement (doi:10.3390/polym13101620), 2021-05-17
Supplement: s1 [file s1]

## Supplementary Materials

**Table S1.** Energy Decomposition Analysis for the complexes of Amoxicillin and Ibuprofen with CS and GOs, by Classical Mechanic.

| COMPLEX   | $\Delta U_{\text{elect}}$ | $\Delta U_{\text{vdW}}$ | $\Delta U_{\text{int}}$ |
|-----------|---------------------------|-------------------------|-------------------------|
| AMOX-GO-1 | -110.7                    | -53.3                   | -164.0                  |
| AMOX-GO-2 | -72.0                     | -61.7                   | -133.7                  |
| AMOX-QS   | -153.3                    | -20.2                   | -173.5                  |
| IBU-GO-1  | -54.9                     | -43.2                   | -98.1                   |
| IBU-GO-2  | -36.3                     | -59.2                   | -95.5                   |
| IBU-QS    | -86.0                     | -30.8                   | -116.8                  |

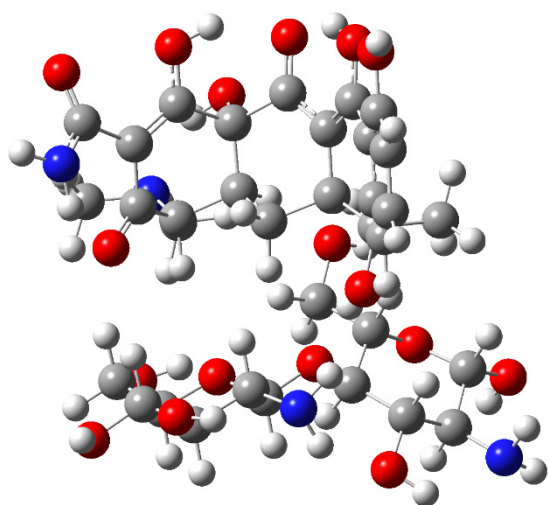

F.S.M.1 CS-Tetracycline

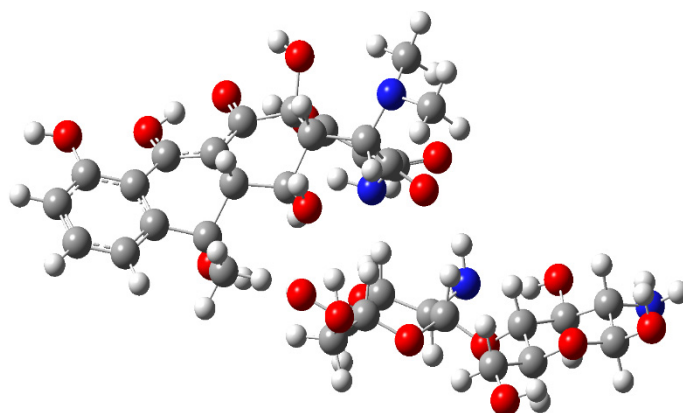

F.S.M.1 CS-Oxitetracycline

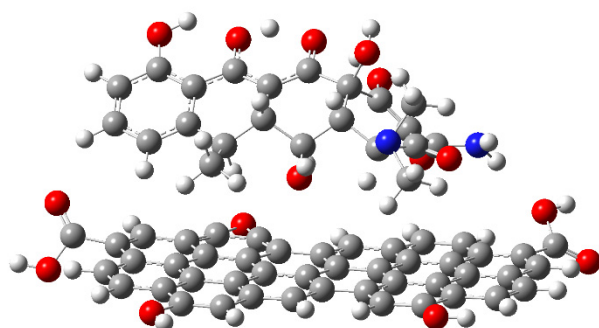

F.S.M.1 GO-Oxitetracycline

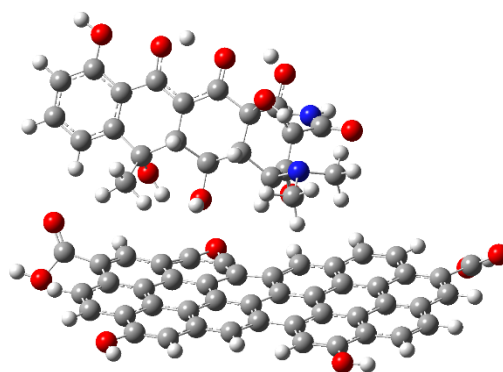

F.S.M.1 GO-doxycycline

Figure S1. Minimum structure for the complexes of tetracycline derivatives with CS and GO, respectively.

### 2. Hessian Matrix for the new complexes

Gaussian 16: ES64L-G16RevA.03 25-Dec-2016

10-May-2021

\*\*\*\*\*

%nprocshared=32

Will use up to 32 processors via shared memory.

%mem=12GB

-----  
# wb97xd/6-311g(2d,p) geom=connectivity counterpoise=2  
-----

1/38=1,57=2,62=2,172=1/1;

2/12=2,17=6,18=5,40=1/2;

1/38=1,53=2,62=2,63=1/22;

3/5=4,6=6,7=102,11=2,25=1,30=1,74=-58/1,2,3;

4//1;

5/5=2,38=5/2;

6/7=2,8=2,9=2,10=2,28=1/1;

1/53=2,62=2,63=1/22;

3/5=7,6=11,7=102,11=2,25=1,30=1,74=-58,82=7/1,2,3;

4//1;

5/5=2,38=5/2;

6/7=2,8=2,9=2,10=2,28=1/1;

1/53=2,62=2,63=1/22(-4);

99/5=1,9=1/99;

-----  
doxy\_GO2\_final  
-----

Symbolic Z-matrix:

Charge = 0 Multiplicity = 1 in supermolecule

Charge = 0 Multiplicity = 1 in fragment 1.

Charge = 0 Multiplicity = 1 in fragment 2.

|               |          |          |          |
|---------------|----------|----------|----------|
| C(Fragment=1) | -6.4406  | 3.16162  | 0.46839  |
| C(Fragment=1) | -5.6328  | 2.17876  | 1.07326  |
| C(Fragment=1) | -4.21851 | 2.25483  | 0.95305  |
| C(Fragment=1) | -3.63579 | 3.30536  | 0.18633  |
| C(Fragment=1) | -4.47972 | 4.26788  | -0.42438 |
| C(Fragment=1) | -5.87465 | 4.19265  | -0.26694 |
| C(Fragment=1) | -3.3468  | 1.29091  | 1.59464  |
| C(Fragment=1) | -2.20093 | 3.38226  | 0.02538  |
| C(Fragment=1) | -1.35367 | 2.43204  | 0.64336  |
| C(Fragment=1) | -1.94608 | 1.37918  | 1.45398  |
| C(Fragment=1) | 0.05796  | 2.51398  | 0.46159  |
| C(Fragment=1) | 0.60268  | 3.54226  | -0.35201 |
| C(Fragment=1) | -0.25177 | 4.48601  | -0.94706 |
| C(Fragment=1) | -1.63497 | 4.42871  | -0.77062 |
| C(Fragment=1) | -2.50154 | 5.4089   | -1.3846  |
| C(Fragment=1) | -3.84809 | 5.32039  | -1.20716 |
| H(Fragment=1) | -2.04563 | 6.19841  | -1.9742  |
| H(Fragment=1) | -7.52597 | 3.12775  | 0.59508  |
| H(Fragment=1) | -6.50405 | 4.9572   | -0.73356 |
| H(Fragment=1) | 0.17496  | 5.28327  | -1.56129 |
| C(Fragment=1) | -6.22334 | 1.06394  | 1.81107  |
| C(Fragment=1) | -5.45222 | 0.14591  | 2.44843  |
| C(Fragment=1) | -4.01699 | 0.23554  | 2.38072  |
| H(Fragment=1) | -5.88013 | -0.69195 | 3.00976  |
| C(Fragment=1) | -3.09909 | -0.57652 | 2.9453   |
| C(Fragment=1) | -1.71643 | -0.47506 | 2.80368  |
| C(Fragment=1) | -1.01825 | 0.4294   | 2.09362  |

|               |         |          |          |
|---------------|---------|----------|----------|
| C(Fragment=1) | 0.94837 | 1.55762  | 1.09451  |
| C(Fragment=1) | 0.42252 | 0.51879  | 1.9261   |
| C(Fragment=1) | 2.33955 | 1.63814  | 0.90061  |
| C(Fragment=1) | 2.89447 | 2.67183  | 0.04998  |
| C(Fragment=1) | 2.05002 | 3.61202  | -0.56846 |
| C(Fragment=1) | 3.20934 | 0.701    | 1.54176  |
| C(Fragment=1) | 4.31113 | 2.72967  | -0.15947 |
| C(Fragment=1) | 5.18433 | 1.76769  | 0.4765   |
| C(Fragment=1) | 4.63729 | 0.75904  | 1.33372  |
| C(Fragment=1) | 6.5755  | 1.82603  | 0.2543   |
| C(Fragment=1) | 7.11826 | 2.85355  | -0.59835 |
| C(Fragment=1) | 6.29835 | 3.76396  | -1.19307 |
| C(Fragment=1) | 4.87587 | 3.72134  | -0.98804 |
| C(Fragment=1) | 3.98233 | 4.65868  | -1.59771 |
| C(Fragment=1) | 2.61488 | 4.6123   | -1.40051 |
| H(Fragment=1) | 1.97834 | 5.35332  | -1.88896 |
| H(Fragment=1) | 8.19768 | 2.88015  | -0.751   |
| H(Fragment=1) | 6.69979 | 4.54674  | -1.83895 |
| C(Fragment=1) | 1.26629 | -0.38415 | 2.55511  |
| C(Fragment=1) | 2.66953 | -0.30151 | 2.38062  |
| H(Fragment=1) | 0.85951 | -1.17633 | 3.19039  |
| C(Fragment=1) | 3.56009 | -1.227   | 3.03661  |
| C(Fragment=1) | 4.90625 | -1.16061 | 2.84404  |
| C(Fragment=1) | 5.48506 | -0.18148 | 1.96112  |
| H(Fragment=1) | 3.12263 | -2.01067 | 3.66501  |
| H(Fragment=1) | 5.56845 | -1.87417 | 3.34321  |
| C(Fragment=1) | 7.41903 | 0.86141  | 0.87567  |
| H(Fragment=1) | 8.49818 | 0.90873  | 0.69646  |
| C(Fragment=1) | 6.89094 | -0.11978 | 1.6911   |

|               |          |          |          |
|---------------|----------|----------|----------|
| C(Fragment=1) | 7.8574   | -1.08563 | 2.26722  |
| O(Fragment=1) | 8.97461  | -0.88541 | 2.68311  |
| O(Fragment=1) | 7.37499  | -2.38146 | 2.26018  |
| H(Fragment=1) | 8.03891  | -3.02889 | 2.62874  |
| C(Fragment=1) | -7.69497 | 0.86462  | 1.83005  |
| O(Fragment=1) | -8.32008 | -0.11379 | 1.48494  |
| O(Fragment=1) | -8.36159 | 1.95809  | 2.32159  |
| H(Fragment=1) | -9.3494  | 1.81371  | 2.36504  |
| O(Fragment=1) | 4.42635  | 5.66239  | -2.42191 |
| H(Fragment=1) | 5.41646  | 5.65492  | -2.51779 |
| O(Fragment=1) | -4.74597 | 6.20442  | -1.7496  |
| H(Fragment=1) | -4.29739 | 6.91896  | -2.27222 |
| O(Fragment=1) | -2.29776 | -1.54792 | 3.6008   |
| O(Fragment=2) | -0.54091 | 0.00449  | -1.47915 |
| O(Fragment=2) | 1.19701  | -4.06754 | -3.09992 |
| O(Fragment=2) | -0.60366 | -5.46968 | -1.47249 |
| O(Fragment=2) | 1.62718  | -5.14574 | -0.16736 |
| O(Fragment=2) | -3.05552 | -5.52575 | -1.08452 |
| O(Fragment=2) | 4.20214  | -1.5076  | -1.30472 |
| O(Fragment=2) | -5.6261  | -5.6211  | -0.77232 |
| O(Fragment=2) | 3.23635  | -3.7248  | 1.85849  |
| N(Fragment=2) | 2.22807  | -0.5572  | -3.18018 |
| N(Fragment=2) | 5.02638  | -3.45912 | 0.47884  |
| C(Fragment=2) | 0.61126  | -2.03614 | -2.09827 |
| C(Fragment=2) | -1.91733 | -2.01591 | -1.72366 |
| C(Fragment=2) | -0.55356 | -1.41009 | -1.28768 |
| C(Fragment=2) | 0.72141  | -3.54924 | -1.84921 |
| C(Fragment=2) | 1.89822  | -1.20449 | -1.87036 |
| C(Fragment=2) | -3.08819 | -1.30504 | -0.992   |

|               |          |          |          |
|---------------|----------|----------|----------|
| C(Fragment=2) | -1.86209 | -3.49905 | -1.47868 |
| C(Fragment=2) | -0.65278 | -4.21175 | -1.59034 |
| C(Fragment=2) | 1.72615  | -3.94571 | -0.75554 |
| C(Fragment=2) | -4.34715 | -2.13436 | -0.82523 |
| C(Fragment=2) | 3.0682   | -1.93828 | -1.20682 |
| C(Fragment=2) | -3.04101 | -4.19048 | -1.17804 |
| C(Fragment=2) | 2.76723  | -3.14574 | -0.41716 |
| C(Fragment=2) | -4.30676 | -3.56029 | -0.917   |
| C(Fragment=2) | -3.40537 | 0.01333  | -1.71038 |
| C(Fragment=2) | -5.54344 | -1.50782 | -0.49473 |
| C(Fragment=2) | 3.03697  | 0.683    | -2.98016 |
| C(Fragment=2) | 2.92798  | -1.49647 | -4.10721 |
| C(Fragment=2) | -5.51266 | -4.27717 | -0.69984 |
| C(Fragment=2) | 3.65743  | -3.46401 | 0.7408   |
| C(Fragment=2) | -6.72217 | -2.24426 | -0.26839 |
| C(Fragment=2) | -6.72178 | -3.62386 | -0.37788 |
| H(Fragment=2) | 0.34798  | -1.94286 | -3.19885 |
| H(Fragment=2) | -2.05114 | -1.858   | -2.82609 |
| H(Fragment=2) | -0.40128 | -1.50657 | -0.18662 |
| H(Fragment=2) | 1.64761  | -0.36622 | -1.1395  |
| H(Fragment=2) | -2.74537 | -1.06028 | 0.05405  |
| H(Fragment=2) | -3.73685 | -0.14821 | -2.74086 |
| H(Fragment=2) | -2.51731 | 0.66653  | -1.73304 |
| H(Fragment=2) | -4.19086 | 0.5829   | -1.19616 |
| H(Fragment=2) | -0.35718 | 0.2411   | -2.42122 |
| H(Fragment=2) | 1.22364  | -5.0599  | -3.08252 |
| H(Fragment=2) | -5.585   | -0.41958 | -0.40935 |
| H(Fragment=2) | 2.45599  | 1.40629  | -2.38507 |
| H(Fragment=2) | 4.0046   | 0.51467  | -2.47463 |

|               |          |          |          |
|---------------|----------|----------|----------|
| H(Fragment=2) | 3.23383  | 1.14407  | -3.95995 |
| H(Fragment=2) | 3.97629  | -1.70277 | -3.83716 |
| H(Fragment=2) | 2.39157  | -2.46177 | -4.1494  |
| H(Fragment=2) | 2.90914  | -1.06133 | -5.1184  |
| H(Fragment=2) | 0.83556  | -5.7188  | -0.47784 |
| H(Fragment=2) | -2.08001 | -5.98232 | -1.23931 |
| H(Fragment=2) | -7.64156 | -1.71045 | 0.00955  |
| H(Fragment=2) | -7.61933 | -4.21919 | -0.21465 |
| H(Fragment=2) | 5.38321  | -3.00753 | -0.35935 |
| H(Fragment=2) | 5.66825  | -3.45334 | 1.26558  |
| H(Fragment=2) | -4.76635 | -6.10831 | -0.97637 |

Stoichiometry C<sub>68</sub>H<sub>40</sub>N<sub>2</sub>O<sub>15</sub>

Framework group C1[X(C<sub>68</sub>H<sub>40</sub>N<sub>2</sub>O<sub>15</sub>)]

Deg. of freedom 369

Full point group C1 NOp 1

Largest Abelian subgroup C1 NOp 1

Largest concise Abelian subgroup C1 NOp 1

Standard orientation:

| Center | Atomic | Atomic | Coordinates (Angstroms) |          |           |
|--------|--------|--------|-------------------------|----------|-----------|
| Number | Number | Type   | X                       | Y        | Z         |
| 1      | 6      | 0      | -6.440598               | 3.161625 | 0.468385  |
| 2      | 6      | 0      | -5.632801               | 2.178755 | 1.073262  |
| 3      | 6      | 0      | -4.218513               | 2.254833 | 0.953046  |
| 4      | 6      | 0      | -3.635794               | 3.305362 | 0.186326  |
| 5      | 6      | 0      | -4.479720               | 4.267877 | -0.424376 |
| 6      | 6      | 0      | -5.874647               | 4.192653 | -0.266936 |

|    |   |   |           |           |           |
|----|---|---|-----------|-----------|-----------|
| 7  | 6 | 0 | -3.346797 | 1.290908  | 1.594644  |
| 8  | 6 | 0 | -2.200929 | 3.382264  | 0.025375  |
| 9  | 6 | 0 | -1.353666 | 2.432037  | 0.643356  |
| 10 | 6 | 0 | -1.946080 | 1.379178  | 1.453979  |
| 11 | 6 | 0 | 0.057959  | 2.513976  | 0.461589  |
| 12 | 6 | 0 | 0.602679  | 3.542257  | -0.352006 |
| 13 | 6 | 0 | -0.251765 | 4.486011  | -0.947062 |
| 14 | 6 | 0 | -1.634966 | 4.428712  | -0.770619 |
| 15 | 6 | 0 | -2.501544 | 5.408902  | -1.384597 |
| 16 | 6 | 0 | -3.848089 | 5.320394  | -1.207155 |
| 17 | 1 | 0 | -2.045628 | 6.198413  | -1.974195 |
| 18 | 1 | 0 | -7.525974 | 3.127753  | 0.595081  |
| 19 | 1 | 0 | -6.504052 | 4.957202  | -0.733557 |
| 20 | 1 | 0 | 0.174957  | 5.283272  | -1.561291 |
| 21 | 6 | 0 | -6.223344 | 1.063938  | 1.811065  |
| 22 | 6 | 0 | -5.452217 | 0.145910  | 2.448433  |
| 23 | 6 | 0 | -4.016985 | 0.235537  | 2.380716  |
| 24 | 1 | 0 | -5.880132 | -0.691945 | 3.009765  |
| 25 | 6 | 0 | -3.099087 | -0.576522 | 2.945298  |
| 26 | 6 | 0 | -1.716433 | -0.475056 | 2.803682  |
| 27 | 6 | 0 | -1.018251 | 0.429402  | 2.093620  |
| 28 | 6 | 0 | 0.948371  | 1.557622  | 1.094509  |
| 29 | 6 | 0 | 0.422523  | 0.518786  | 1.926101  |
| 30 | 6 | 0 | 2.339545  | 1.638144  | 0.900612  |
| 31 | 6 | 0 | 2.894465  | 2.671825  | 0.049979  |
| 32 | 6 | 0 | 2.050019  | 3.612024  | -0.568457 |
| 33 | 6 | 0 | 3.209344  | 0.701004  | 1.541761  |
| 34 | 6 | 0 | 4.311131  | 2.729665  | -0.159473 |
| 35 | 6 | 0 | 5.184326  | 1.767691  | 0.476501  |



|    |   |   |           |           |           |
|----|---|---|-----------|-----------|-----------|
| 36 | 6 | 0 | 4.637291  | 0.759043  | 1.333719  |
| 37 | 6 | 0 | 6.575504  | 1.826032  | 0.254295  |
| 38 | 6 | 0 | 7.118257  | 2.853554  | -0.598348 |
| 39 | 6 | 0 | 6.298355  | 3.763961  | -1.193068 |
| 40 | 6 | 0 | 4.875872  | 3.721337  | -0.988039 |
| 41 | 6 | 0 | 3.982325  | 4.658680  | -1.597707 |
| 42 | 6 | 0 | 2.614876  | 4.612303  | -1.400509 |
| 43 | 1 | 0 | 1.978336  | 5.353315  | -1.888959 |
| 44 | 1 | 0 | 8.197685  | 2.880151  | -0.750998 |
| 45 | 1 | 0 | 6.699795  | 4.546742  | -1.838952 |
| 46 | 6 | 0 | 1.266290  | -0.384148 | 2.555106  |
| 47 | 6 | 0 | 2.669532  | -0.301505 | 2.380615  |
| 48 | 1 | 0 | 0.859507  | -1.176329 | 3.190388  |
| 49 | 6 | 0 | 3.560089  | -1.227003 | 3.036609  |
| 50 | 6 | 0 | 4.906254  | -1.160605 | 2.844042  |
| 51 | 6 | 0 | 5.485055  | -0.181475 | 1.961117  |
| 52 | 1 | 0 | 3.122625  | -2.010673 | 3.665005  |
| 53 | 1 | 0 | 5.568450  | -1.874171 | 3.343207  |
| 54 | 6 | 0 | 7.419027  | 0.861409  | 0.875669  |
| 55 | 1 | 0 | 8.498184  | 0.908731  | 0.696463  |
| 56 | 6 | 0 | 6.890937  | -0.119775 | 1.691096  |
| 57 | 6 | 0 | 7.857399  | -1.085628 | 2.267215  |
| 58 | 8 | 0 | 8.974611  | -0.885410 | 2.683106  |
| 59 | 8 | 0 | 7.374992  | -2.381459 | 2.260184  |
| 60 | 1 | 0 | 8.038906  | -3.028891 | 2.628742  |
| 61 | 6 | 0 | -7.694966 | 0.864617  | 1.830048  |
| 62 | 8 | 0 | -8.320080 | -0.113791 | 1.484936  |
| 63 | 8 | 0 | -8.361586 | 1.958086  | 2.321588  |
| 64 | 1 | 0 | -9.349398 | 1.813709  | 2.365040  |

|    |   |   |           |           |           |
|----|---|---|-----------|-----------|-----------|
| 65 | 8 | 0 | 4.426352  | 5.662389  | -2.421908 |
| 66 | 1 | 0 | 5.416455  | 5.654922  | -2.517791 |
| 67 | 8 | 0 | -4.745974 | 6.204423  | -1.749598 |
| 68 | 1 | 0 | -4.297393 | 6.918960  | -2.272218 |
| 69 | 8 | 0 | -2.297756 | -1.547919 | 3.600795  |
| 70 | 8 | 0 | -0.540911 | 0.004486  | -1.479145 |
| 71 | 8 | 0 | 1.197009  | -4.067541 | -3.099916 |
| 72 | 8 | 0 | -0.603655 | -5.469676 | -1.472487 |
| 73 | 8 | 0 | 1.627175  | -5.145744 | -0.167356 |
| 74 | 8 | 0 | -3.055516 | -5.525749 | -1.084523 |
| 75 | 8 | 0 | 4.202137  | -1.507599 | -1.304721 |
| 76 | 8 | 0 | -5.626102 | -5.621100 | -0.772322 |
| 77 | 8 | 0 | 3.236351  | -3.724796 | 1.858485  |
| 78 | 7 | 0 | 2.228070  | -0.557200 | -3.180179 |
| 79 | 7 | 0 | 5.026377  | -3.459119 | 0.478837  |
| 80 | 6 | 0 | 0.611258  | -2.036137 | -2.098271 |
| 81 | 6 | 0 | -1.917331 | -2.015910 | -1.723658 |
| 82 | 6 | 0 | -0.553557 | -1.410085 | -1.287684 |
| 83 | 6 | 0 | 0.721409  | -3.549242 | -1.849205 |
| 84 | 6 | 0 | 1.898221  | -1.204491 | -1.870362 |
| 85 | 6 | 0 | -3.088193 | -1.305043 | -0.992003 |
| 86 | 6 | 0 | -1.862090 | -3.499045 | -1.478682 |
| 87 | 6 | 0 | -0.652778 | -4.211753 | -1.590343 |
| 88 | 6 | 0 | 1.726148  | -3.945707 | -0.755536 |
| 89 | 6 | 0 | -4.347148 | -2.134363 | -0.825231 |
| 90 | 6 | 0 | 3.068195  | -1.938281 | -1.206823 |
| 91 | 6 | 0 | -3.041011 | -4.190485 | -1.178037 |
| 92 | 6 | 0 | 2.767230  | -3.145743 | -0.417155 |
| 93 | 6 | 0 | -4.306762 | -3.560290 | -0.917003 |

|     |   |   |           |           |           |
|-----|---|---|-----------|-----------|-----------|
| 94  | 6 | 0 | -3.405369 | 0.013331  | -1.710382 |
| 95  | 6 | 0 | -5.543441 | -1.507823 | -0.494725 |
| 96  | 6 | 0 | 3.036972  | 0.682996  | -2.980158 |
| 97  | 6 | 0 | 2.927979  | -1.496465 | -4.107206 |
| 98  | 6 | 0 | -5.512657 | -4.277169 | -0.699841 |
| 99  | 6 | 0 | 3.657431  | -3.464008 | 0.740797  |
| 100 | 6 | 0 | -6.722166 | -2.244255 | -0.268387 |
| 101 | 6 | 0 | -6.721784 | -3.623857 | -0.377876 |
| 102 | 1 | 0 | 0.347981  | -1.942863 | -3.198851 |
| 103 | 1 | 0 | -2.051138 | -1.857995 | -2.826092 |
| 104 | 1 | 0 | -0.401276 | -1.506569 | -0.186615 |
| 105 | 1 | 0 | 1.647610  | -0.366220 | -1.139498 |
| 106 | 1 | 0 | -2.745371 | -1.060282 | 0.054047  |
| 107 | 1 | 0 | -3.736846 | -0.148211 | -2.740856 |
| 108 | 1 | 0 | -2.517312 | 0.666525  | -1.733040 |
| 109 | 1 | 0 | -4.190861 | 0.582901  | -1.196160 |
| 110 | 1 | 0 | -0.357184 | 0.241096  | -2.421220 |
| 111 | 1 | 0 | 1.223641  | -5.059904 | -3.082520 |
| 112 | 1 | 0 | -5.585000 | -0.419584 | -0.409351 |
| 113 | 1 | 0 | 2.455994  | 1.406294  | -2.385071 |
| 114 | 1 | 0 | 4.004605  | 0.514669  | -2.474631 |
| 115 | 1 | 0 | 3.233826  | 1.144068  | -3.959953 |
| 116 | 1 | 0 | 3.976290  | -1.702768 | -3.837159 |
| 117 | 1 | 0 | 2.391571  | -2.461766 | -4.149404 |
| 118 | 1 | 0 | 2.909135  | -1.061329 | -5.118401 |
| 119 | 1 | 0 | 0.835564  | -5.718796 | -0.477843 |
| 120 | 1 | 0 | -2.080008 | -5.982320 | -1.239312 |
| 121 | 1 | 0 | -7.641557 | -1.710448 | 0.009554  |
| 122 | 1 | 0 | -7.619328 | -4.219187 | -0.214653 |

|     |   |   |           |           |           |
|-----|---|---|-----------|-----------|-----------|
| 123 | 1 | 0 | 5.383211  | -3.007531 | -0.359349 |
| 124 | 1 | 0 | 5.668247  | -3.453337 | 1.265582  |
| 125 | 1 | 0 | -4.766352 | -6.108308 | -0.976369 |

-----

Gaussian 16: ES64L-G16RevA.03 25-Dec-2016

10-May-2021

\*\*\*\*\*

%nprocshared=32

Will use up to 32 processors via shared memory.

%mem=12GB

-----

# wb97xd/6-311g(2d,p) counterpoise=2

-----

1/38=1,62=2,172=1/1;

2/12=2,17=6,18=5,40=1/2;

1/38=1,53=2,62=2,63=1/22;

3/5=4,6=6,7=102,11=2,25=1,30=1,74=-58/1,2,3;

4//1;

5/5=2,38=5/2;

6/7=2,8=2,9=2,10=2,28=1/1;

1/53=2,62=2,63=1/22;

3/5=7,6=11,7=102,11=2,25=1,30=1,74=-58,82=7/1,2,3;

4//1;

5/5=2,38=5/2;

6/7=2,8=2,9=2,10=2,28=1/1;

1/53=2,62=2,63=1/22(-4);

99/5=1,9=1/99;

-----

oxitetracycline\_GO2\_counterpoise

-----  
Symbolic Z-matrix:

Charge = 0 Multiplicity = 1 in supermolecule

Charge = 0 Multiplicity = 1 in fragment 1.

Charge = 0 Multiplicity = 1 in fragment 2.

C(Fragment=1) -3.95483 5.37633 0.53402

C(Fragment=1) -3.46633 4.1895 1.11402

C(Fragment=1) -2.10689 3.8196 0.92998

C(Fragment=1) -1.26369 4.63167 0.11877

C(Fragment=1) -1.78957 5.81505 -0.46028

C(Fragment=1) -3.12837 6.18108 -0.23731

C(Fragment=1) -1.5492 2.63917 1.55885

C(Fragment=1) 0.10989 4.24685 -0.11733

C(Fragment=1) 0.63467 3.06339 0.45356

C(Fragment=1) -0.21454 2.25866 1.31757

C(Fragment=1) 1.97991 2.6789 0.17963

C(Fragment=1) 2.79167 3.50179 -0.64432

C(Fragment=1) 2.26179 4.68688 -1.18359

C(Fragment=1) 0.94238 5.0707 -0.94086

C(Fragment=1) 0.40341 6.28244 -1.51507

C(Fragment=1) -0.89342 6.62108 -1.27685

H(Fragment=1) 1.05889 6.89523 -2.12637

H(Fragment=1) -4.98865 5.6827 0.71107

H(Fragment=1) -3.50687 7.10732 -0.68126

H(Fragment=1) 2.89528 5.32056 -1.80986

C(Fragment=1) -4.33704 3.31584 1.89808

C(Fragment=1) -3.85159 2.23656 2.56243

C(Fragment=1) -2.46029 1.88469 2.44454

|               |          |          |          |
|---------------|----------|----------|----------|
| H(Fragment=1) | -4.48895 | 1.5843   | 3.17107  |
| C(Fragment=1) | -1.80039 | 0.85873  | 3.02181  |
| C(Fragment=1) | -0.47702 | 0.48833  | 2.77119  |
| C(Fragment=1) | 0.39243  | 1.05493  | 1.91712  |
| C(Fragment=1) | 2.52642  | 1.44629  | 0.71808  |
| C(Fragment=1) | 1.73272  | 0.61335  | 1.56924  |
| C(Fragment=1) | 3.83543  | 1.04457  | 0.39781  |
| C(Fragment=1) | 4.66854  | 1.88817  | -0.4351  |
| C(Fragment=1) | 4.17061  | 3.10378  | -0.93892 |
| C(Fragment=1) | 4.34696  | -0.19754 | 0.89162  |
| C(Fragment=1) | 6.00699  | 1.47698  | -0.74008 |
| C(Fragment=1) | 6.51768  | 0.21954  | -0.23984 |
| C(Fragment=1) | 5.68917  | -0.62345 | 0.57068  |
| C(Fragment=1) | 7.83167  | -0.1797  | -0.55702 |
| C(Fragment=1) | 8.66038  | 0.67299  | -1.37132 |
| C(Fragment=1) | 8.18243  | 1.85927  | -1.8394  |
| C(Fragment=1) | 6.84367  | 2.28655  | -1.5363  |
| C(Fragment=1) | 6.3034   | 3.52193  | -2.01717 |
| C(Fragment=1) | 5.01105  | 3.92332  | -1.73508 |
| H(Fragment=1) | 4.64828  | 4.8753   | -2.12853 |
| H(Fragment=1) | 9.67387  | 0.34147  | -1.59997 |
| H(Fragment=1) | 8.80205  | 2.51278  | -2.4561  |
| C(Fragment=1) | 2.22157  | -0.59586 | 2.03573  |
| C(Fragment=1) | 3.52948  | -1.02341 | 1.69655  |
| H(Fragment=1) | 1.59119  | -1.25298 | 2.65296  |
| C(Fragment=1) | 4.0408   | -2.29159 | 2.153    |
| C(Fragment=1) | 5.3056   | -2.68909 | 1.84502  |
| C(Fragment=1) | 6.17862  | -1.85875 | 1.05402  |
| H(Fragment=1) | 3.37679  | -2.9279  | 2.7468   |

|               |          |          |          |
|---------------|----------|----------|----------|
| H(Fragment=1) | 5.6839   | -3.65277 | 2.20427  |
| C(Fragment=1) | 8.31454  | -1.42621 | -0.06668 |
| H(Fragment=1) | 9.33172  | -1.7395  | -0.32816 |
| C(Fragment=1) | 7.51976  | -2.23799 | 0.7186   |
| C(Fragment=1) | 8.14472  | -3.51222 | 1.15627  |
| O(Fragment=1) | 8.96726  | -4.17746 | 0.56682  |
| O(Fragment=1) | 7.73543  | -3.91331 | 2.4071   |
| H(Fragment=1) | 8.18308  | -4.75887 | 2.69365  |
| C(Fragment=1) | -5.8016  | 3.55829  | 1.91847  |
| O(Fragment=1) | -6.68141 | 2.84711  | 1.48505  |
| O(Fragment=1) | -6.11978 | 4.75106  | 2.5146   |
| H(Fragment=1) | -7.1051  | 4.90864  | 2.55448  |
| O(Fragment=1) | 7.03337  | 4.38601  | -2.79449 |
| H(Fragment=1) | 7.95504  | 4.0506   | -2.96005 |
| O(Fragment=1) | -1.48928 | 7.74801  | -1.78306 |
| H(Fragment=1) | -0.8612  | 8.29073  | -2.32722 |
| O(Fragment=1) | -1.31052 | -0.30253 | 3.6671   |
| O(Fragment=2) | -1.97228 | -0.2709  | 0.16224  |
| O(Fragment=2) | -1.21423 | -3.79488 | -3.00413 |
| O(Fragment=2) | -4.53367 | -0.64301 | 1.08765  |
| O(Fragment=2) | -3.62225 | -4.88705 | -2.27822 |
| O(Fragment=2) | -1.58277 | -5.96947 | -1.16968 |
| O(Fragment=2) | -6.04577 | -4.20012 | -2.03108 |
| O(Fragment=2) | 0.46987  | -2.92068 | 1.73317  |
| O(Fragment=2) | -8.31344 | -3.55162 | -1.90564 |
| O(Fragment=2) | 1.3436   | -6.07138 | 0.84635  |
| N(Fragment=2) | 1.09088  | -2.43984 | -1.54932 |
| N(Fragment=2) | -0.63748 | -6.3117  | 1.93273  |
| C(Fragment=2) | -1.32455 | -2.16849 | -1.21201 |

|               |          |          |          |
|---------------|----------|----------|----------|
| C(Fragment=2) | -3.73717 | -1.38629 | -1.12579 |
| C(Fragment=2) | -2.41883 | -1.54294 | -0.32571 |
| C(Fragment=2) | -1.7372  | -3.57195 | -1.69509 |
| C(Fragment=2) | 0.04919  | -2.16559 | -0.49783 |
| C(Fragment=2) | -4.76509 | -0.51888 | -0.32497 |
| C(Fragment=2) | -4.20863 | -2.75249 | -1.52177 |
| C(Fragment=2) | -3.26754 | -3.76021 | -1.87656 |
| C(Fragment=2) | -1.21763 | -4.72974 | -0.81948 |
| C(Fragment=2) | -6.2321  | -0.93591 | -0.4463  |
| C(Fragment=2) | 0.07245  | -3.21899 | 0.62875  |
| C(Fragment=2) | -5.57106 | -3.04184 | -1.57791 |
| C(Fragment=2) | -0.40617 | -4.55586 | 0.25285  |
| C(Fragment=2) | -4.6066  | 0.95236  | -0.73814 |
| C(Fragment=2) | -6.6034  | -2.12903 | -1.11127 |
| C(Fragment=2) | -7.20915 | -0.11805 | 0.12123  |
| C(Fragment=2) | 1.59934  | -1.14754 | -2.10752 |
| C(Fragment=2) | 2.23595  | -3.25443 | -1.04527 |
| C(Fragment=2) | -7.98561 | -2.41636 | -1.22804 |
| C(Fragment=2) | 0.19406  | -5.69497 | 1.00749  |
| C(Fragment=2) | -8.56923 | -0.43897 | 0.00834  |
| C(Fragment=2) | -8.97318 | -1.57874 | -0.67927 |
| H(Fragment=2) | -1.22021 | -1.53938 | -2.14046 |
| H(Fragment=2) | -3.52082 | -0.83529 | -2.08155 |
| H(Fragment=2) | -2.58081 | -2.11335 | 0.62219  |
| H(Fragment=2) | 0.19151  | -1.161   | -0.00472 |
| H(Fragment=2) | -3.57753 | 1.3066   | -0.60833 |
| H(Fragment=2) | -5.24076 | 1.60484  | -0.113   |
| H(Fragment=2) | -4.90407 | 1.12446  | -1.77784 |
| H(Fragment=2) | -1.80657 | 0.36575  | -0.56543 |



|               |           |          |          |
|---------------|-----------|----------|----------|
| H(Fragment=2) | -0.22538  | -3.57947 | -3.00344 |
| H(Fragment=2) | -3.6665   | -0.22499 | 1.33434  |
| H(Fragment=2) | -6.91478  | 0.78451  | 0.67488  |
| H(Fragment=2) | 0.76396   | -0.55868 | -2.51336 |
| H(Fragment=2) | 2.14904   | -0.52121 | -1.38522 |
| H(Fragment=2) | 2.27946   | -1.36885 | -2.94707 |
| H(Fragment=2) | 2.75046   | -2.83797 | -0.16516 |
| H(Fragment=2) | 1.89457   | -4.27846 | -0.78965 |
| H(Fragment=2) | 2.98012   | -3.37316 | -1.84886 |
| H(Fragment=2) | -2.21676  | -5.98539 | -1.99378 |
| H(Fragment=2) | -5.29092  | -4.87566 | -2.3436  |
| H(Fragment=2) | -9.3154   | 0.21752  | 0.46271  |
| H(Fragment=2) | -10.02606 | -1.82298 | -0.78101 |
| H(Fragment=2) | -1.57621  | -6.0042  | 2.1077   |
| H(Fragment=2) | -0.29454  | -7.07606 | 2.49192  |
| H(Fragment=2) | -9.29654  | -3.70158 | -1.94168 |

Stoichiometry C<sub>68</sub>H<sub>40</sub>N<sub>2</sub>O<sub>16</sub>

Framework group C1[X(C<sub>68</sub>H<sub>40</sub>N<sub>2</sub>O<sub>16</sub>)]

Deg. of freedom 372

Full point group C1 NOp 1

Largest Abelian subgroup C1 NOp 1

Largest concise Abelian subgroup C1 NOp 1

Standard orientation:

| -----  |        |        |                         |          |          |
|--------|--------|--------|-------------------------|----------|----------|
| Center | Atomic | Atomic | Coordinates (Angstroms) |          |          |
| Number | Number | Type   | X                       | Y        | Z        |
| -----  |        |        |                         |          |          |
| 1      | 6      | 0      | -3.954831               | 5.376327 | 0.534021 |

|    |   |   |           |          |           |
|----|---|---|-----------|----------|-----------|
| 2  | 6 | 0 | -3.466334 | 4.189502 | 1.114018  |
| 3  | 6 | 0 | -2.106888 | 3.819595 | 0.929981  |
| 4  | 6 | 0 | -1.263689 | 4.631671 | 0.118767  |
| 5  | 6 | 0 | -1.789572 | 5.815049 | -0.460283 |
| 6  | 6 | 0 | -3.128369 | 6.181078 | -0.237306 |
| 7  | 6 | 0 | -1.549201 | 2.639167 | 1.558850  |
| 8  | 6 | 0 | 0.109891  | 4.246852 | -0.117327 |
| 9  | 6 | 0 | 0.634665  | 3.063392 | 0.453559  |
| 10 | 6 | 0 | -0.214535 | 2.258661 | 1.317574  |
| 11 | 6 | 0 | 1.979906  | 2.678897 | 0.179634  |
| 12 | 6 | 0 | 2.791668  | 3.501793 | -0.644323 |
| 13 | 6 | 0 | 2.261791  | 4.686881 | -1.183592 |
| 14 | 6 | 0 | 0.942379  | 5.070700 | -0.940862 |
| 15 | 6 | 0 | 0.403411  | 6.282444 | -1.515073 |
| 16 | 6 | 0 | -0.893418 | 6.621083 | -1.276851 |
| 17 | 1 | 0 | 1.058886  | 6.895225 | -2.126368 |
| 18 | 1 | 0 | -4.988645 | 5.682697 | 0.711072  |
| 19 | 1 | 0 | -3.506872 | 7.107323 | -0.681260 |
| 20 | 1 | 0 | 2.895279  | 5.320557 | -1.809861 |
| 21 | 6 | 0 | -4.337038 | 3.315844 | 1.898080  |
| 22 | 6 | 0 | -3.851587 | 2.236558 | 2.562426  |
| 23 | 6 | 0 | -2.460293 | 1.884689 | 2.444544  |
| 24 | 1 | 0 | -4.488951 | 1.584297 | 3.171072  |
| 25 | 6 | 0 | -1.800390 | 0.858728 | 3.021813  |
| 26 | 6 | 0 | -0.477024 | 0.488334 | 2.771193  |
| 27 | 6 | 0 | 0.392428  | 1.054933 | 1.917121  |
| 28 | 6 | 0 | 2.526422  | 1.446289 | 0.718077  |
| 29 | 6 | 0 | 1.732715  | 0.613349 | 1.569240  |
| 30 | 6 | 0 | 3.835425  | 1.044567 | 0.397811  |

|    |   |   |          |           |           |
|----|---|---|----------|-----------|-----------|
| 31 | 6 | 0 | 4.668537 | 1.888172  | -0.435104 |
| 32 | 6 | 0 | 4.170609 | 3.103784  | -0.938916 |
| 33 | 6 | 0 | 4.346964 | -0.197544 | 0.891623  |
| 34 | 6 | 0 | 6.006986 | 1.476982  | -0.740078 |
| 35 | 6 | 0 | 6.517680 | 0.219543  | -0.239839 |
| 36 | 6 | 0 | 5.689165 | -0.623448 | 0.570683  |
| 37 | 6 | 0 | 7.831670 | -0.179704 | -0.557024 |
| 38 | 6 | 0 | 8.660385 | 0.672991  | -1.371321 |
| 39 | 6 | 0 | 8.182430 | 1.859266  | -1.839397 |
| 40 | 6 | 0 | 6.843670 | 2.286551  | -1.536298 |
| 41 | 6 | 0 | 6.303403 | 3.521928  | -2.017174 |
| 42 | 6 | 0 | 5.011045 | 3.923315  | -1.735075 |
| 43 | 1 | 0 | 4.648284 | 4.875304  | -2.128528 |
| 44 | 1 | 0 | 9.673874 | 0.341465  | -1.599974 |
| 45 | 1 | 0 | 8.802051 | 2.512779  | -2.456100 |
| 46 | 6 | 0 | 2.221573 | -0.595858 | 2.035733  |
| 47 | 6 | 0 | 3.529475 | -1.023408 | 1.696548  |
| 48 | 1 | 0 | 1.591186 | -1.252979 | 2.652961  |
| 49 | 6 | 0 | 4.040797 | -2.291588 | 2.152997  |
| 50 | 6 | 0 | 5.305604 | -2.689087 | 1.845017  |
| 51 | 6 | 0 | 6.178623 | -1.858745 | 1.054023  |
| 52 | 1 | 0 | 3.376794 | -2.927904 | 2.746799  |
| 53 | 1 | 0 | 5.683904 | -3.652773 | 2.204274  |
| 54 | 6 | 0 | 8.314540 | -1.426207 | -0.066682 |
| 55 | 1 | 0 | 9.331720 | -1.739501 | -0.328158 |
| 56 | 6 | 0 | 7.519764 | -2.237994 | 0.718601  |
| 57 | 6 | 0 | 8.144721 | -3.512222 | 1.156268  |
| 58 | 8 | 0 | 8.967257 | -4.177463 | 0.566816  |
| 59 | 8 | 0 | 7.735434 | -3.913313 | 2.407104  |

|    |   |   |           |           |           |
|----|---|---|-----------|-----------|-----------|
| 60 | 1 | 0 | 8.183080  | -4.758872 | 2.693648  |
| 61 | 6 | 0 | -5.801597 | 3.558286  | 1.918467  |
| 62 | 8 | 0 | -6.681412 | 2.847111  | 1.485053  |
| 63 | 8 | 0 | -6.119782 | 4.751061  | 2.514596  |
| 64 | 1 | 0 | -7.105098 | 4.908638  | 2.554475  |
| 65 | 8 | 0 | 7.033370  | 4.386009  | -2.794486 |
| 66 | 1 | 0 | 7.955036  | 4.050601  | -2.960047 |
| 67 | 8 | 0 | -1.489277 | 7.748006  | -1.783061 |
| 68 | 1 | 0 | -0.861199 | 8.290730  | -2.327221 |
| 69 | 8 | 0 | -1.310518 | -0.302529 | 3.667095  |
| 70 | 8 | 0 | -1.972277 | -0.270895 | 0.162243  |
| 71 | 8 | 0 | -1.214234 | -3.794875 | -3.004127 |
| 72 | 8 | 0 | -4.533667 | -0.643013 | 1.087647  |
| 73 | 8 | 0 | -3.622246 | -4.887048 | -2.278218 |
| 74 | 8 | 0 | -1.582767 | -5.969471 | -1.169681 |
| 75 | 8 | 0 | -6.045767 | -4.200118 | -2.031080 |
| 76 | 8 | 0 | 0.469868  | -2.920680 | 1.733170  |
| 77 | 8 | 0 | -8.313435 | -3.551617 | -1.905640 |
| 78 | 8 | 0 | 1.343597  | -6.071378 | 0.846353  |
| 79 | 7 | 0 | 1.090878  | -2.439838 | -1.549323 |
| 80 | 7 | 0 | -0.637479 | -6.311695 | 1.932731  |
| 81 | 6 | 0 | -1.324548 | -2.168490 | -1.212009 |
| 82 | 6 | 0 | -3.737168 | -1.386285 | -1.125790 |
| 83 | 6 | 0 | -2.418833 | -1.542940 | -0.325709 |
| 84 | 6 | 0 | -1.737200 | -3.571952 | -1.695087 |
| 85 | 6 | 0 | 0.049190  | -2.165586 | -0.497828 |
| 86 | 6 | 0 | -4.765090 | -0.518884 | -0.324966 |
| 87 | 6 | 0 | -4.208632 | -2.752490 | -1.521769 |
| 88 | 6 | 0 | -3.267542 | -3.760210 | -1.876555 |

|     |   |   |           |           |           |
|-----|---|---|-----------|-----------|-----------|
| 89  | 6 | 0 | -1.217629 | -4.729739 | -0.819478 |
| 90  | 6 | 0 | -6.232104 | -0.935912 | -0.446300 |
| 91  | 6 | 0 | 0.072454  | -3.218993 | 0.628747  |
| 92  | 6 | 0 | -5.571062 | -3.041839 | -1.577910 |
| 93  | 6 | 0 | -0.406169 | -4.555860 | 0.252854  |
| 94  | 6 | 0 | -4.606600 | 0.952356  | -0.738136 |
| 95  | 6 | 0 | -6.603404 | -2.129033 | -1.111268 |
| 96  | 6 | 0 | -7.209146 | -0.118048 | 0.121231  |
| 97  | 6 | 0 | 1.599335  | -1.147539 | -2.107521 |
| 98  | 6 | 0 | 2.235951  | -3.254430 | -1.045268 |
| 99  | 6 | 0 | -7.985609 | -2.416362 | -1.228036 |
| 100 | 6 | 0 | 0.194055  | -5.694971 | 1.007494  |
| 101 | 6 | 0 | -8.569233 | -0.438968 | 0.008343  |
| 102 | 6 | 0 | -8.973180 | -1.578742 | -0.679267 |
| 103 | 1 | 0 | -1.220205 | -1.539383 | -2.140460 |
| 104 | 1 | 0 | -3.520818 | -0.835290 | -2.081545 |
| 105 | 1 | 0 | -2.580809 | -2.113353 | 0.622193  |
| 106 | 1 | 0 | 0.191509  | -1.161002 | -0.004716 |
| 107 | 1 | 0 | -3.577529 | 1.306603  | -0.608327 |
| 108 | 1 | 0 | -5.240755 | 1.604838  | -0.112997 |
| 109 | 1 | 0 | -4.904070 | 1.124461  | -1.777840 |
| 110 | 1 | 0 | -1.806574 | 0.365747  | -0.565425 |
| 111 | 1 | 0 | -0.225377 | -3.579468 | -3.003443 |
| 112 | 1 | 0 | -3.666501 | -0.224992 | 1.334337  |
| 113 | 1 | 0 | -6.914783 | 0.784505  | 0.674878  |
| 114 | 1 | 0 | 0.763960  | -0.558684 | -2.513364 |
| 115 | 1 | 0 | 2.149038  | -0.521209 | -1.385217 |
| 116 | 1 | 0 | 2.279456  | -1.368854 | -2.947066 |
| 117 | 1 | 0 | 2.750456  | -2.837969 | -0.165163 |

|     |   |   |            |           |           |
|-----|---|---|------------|-----------|-----------|
| 118 | 1 | 0 | 1.894565   | -4.278460 | -0.789648 |
| 119 | 1 | 0 | 2.980122   | -3.373162 | -1.848863 |
| 120 | 1 | 0 | -2.216764  | -5.985390 | -1.993775 |
| 121 | 1 | 0 | -5.290918  | -4.875656 | -2.343601 |
| 122 | 1 | 0 | -9.315399  | 0.217516  | 0.462709  |
| 123 | 1 | 0 | -10.026060 | -1.822980 | -0.781005 |
| 124 | 1 | 0 | -1.576207  | -6.004197 | 2.107704  |
| 125 | 1 | 0 | -0.294535  | -7.076063 | 2.491915  |
| 126 | 1 | 0 | -9.296537  | -3.701576 | -1.941682 |

-----

Gaussian 16: ES64L-G16RevA.03 25-Dec-2016

10-May-2021

\*\*\*\*\*

%nprocshared=32

Will use up to 32 processors via shared memory.

%mem=12GB

-----

# wb97xd/6-311g(2d,p) counterpoise=2

-----

1/38=1,62=2,172=1/1;

2/12=2,17=6,18=5,40=1/2;

1/38=1,53=2,62=2,63=1/22;

3/5=4,6=6,7=102,11=2,25=1,30=1,74=-58/1,2,3;

4//1;

5/5=2,38=5/2;

6/7=2,8=2,9=2,10=2,28=1/1;

1/53=2,62=2,63=1/22;

3/5=7,6=11,7=102,11=2,25=1,30=1,74=-58,82=7/1,2,3;

4//1;

5/5=2,38=5/2;

6/7=2,8=2,9=2,10=2,28=1/1;

1/53=2,62=2,63=1/22(-4);

99/5=1,9=1/99;

-----

tetraxiline\_GO2\_counterpoise

-----

Symbolic Z-matrix:

Charge = 0 Multiplicity = 1 in supermolecule

Charge = 0 Multiplicity = 1 in fragment 1.

Charge = 0 Multiplicity = 1 in fragment 2.

C(Fragment=1) -5.53578 4.62758 0.67635

C(Fragment=1) -4.84664 3.48068 1.11739

C(Fragment=1) -3.44237 3.38093 0.9135

C(Fragment=1) -2.75353 4.43559 0.24705

C(Fragment=1) -3.48119 5.57124 -0.19165

C(Fragment=1) -4.86598 5.65814 0.03428

C(Fragment=1) -2.68519 2.23235 1.36986

C(Fragment=1) -1.32855 4.34689 0.01634

C(Fragment=1) -0.59543 3.21906 0.45571

C(Fragment=1) -1.2947 2.14872 1.14807

C(Fragment=1) 0.80777 3.14513 0.21288

C(Fragment=1) 1.46001 4.20691 -0.46748

C(Fragment=1) 0.71843 5.32227 -0.89163

C(Fragment=1) -0.65532 5.41291 -0.66227

C(Fragment=1) -1.40428 6.56669 -1.10359

C(Fragment=1) -2.74417 6.62669 -0.87021

H(Fragment=1) -0.86839 7.36271 -1.61121

|               |          |          |          |
|---------------|----------|----------|----------|
| H(Fragment=1) | -6.61021 | 4.72153  | 0.85806  |
| H(Fragment=1) | -5.40453 | 6.54941  | -0.30324 |
| H(Fragment=1) | 1.22726  | 6.13903  | -1.41017 |
| C(Fragment=1) | -5.55053 | 2.37699  | 1.76715  |
| C(Fragment=1) | -4.88362 | 1.28317  | 2.22336  |
| C(Fragment=1) | -3.45942 | 1.18143  | 2.06012  |
| H(Fragment=1) | -5.39793 | 0.44614  | 2.70985  |
| C(Fragment=1) | -2.64391 | 0.17349  | 2.43786  |
| C(Fragment=1) | -1.26753 | 0.10755  | 2.22074  |
| C(Fragment=1) | -0.48352 | 1.00145  | 1.59399  |
| C(Fragment=1) | 1.58207  | 1.99955  | 0.65521  |
| C(Fragment=1) | 0.94734  | 0.92209  | 1.35127  |
| C(Fragment=1) | 2.9651   | 1.93148  | 0.40744  |
| C(Fragment=1) | 3.63073  | 3.01118  | -0.29312 |
| C(Fragment=1) | 2.90096  | 4.13403  | -0.72437 |
| C(Fragment=1) | 3.71886  | 0.7975   | 0.84665  |
| C(Fragment=1) | 5.03981  | 2.93011  | -0.54047 |
| C(Fragment=1) | 5.79484  | 1.77746  | -0.10042 |
| C(Fragment=1) | 5.13751  | 0.70824  | 0.59097  |
| C(Fragment=1) | 7.18066  | 1.70874  | -0.34894 |
| C(Fragment=1) | 7.83652  | 2.79137  | -1.03803 |
| C(Fragment=1) | 7.12718  | 3.87719  | -1.45343 |
| C(Fragment=1) | 5.71245  | 3.97038  | -1.21505 |
| C(Fragment=1) | 4.93371  | 5.09499  | -1.6366  |
| C(Fragment=1) | 3.57363  | 5.18133  | -1.40418 |
| H(Fragment=1) | 3.02715  | 6.06309  | -1.74613 |
| H(Fragment=1) | 8.91018  | 2.71599  | -1.21362 |
| H(Fragment=1) | 7.61447  | 4.70265  | -1.97557 |
| C(Fragment=1) | 1.67793  | -0.17245 | 1.78403  |



|               |          |          |          |
|---------------|----------|----------|----------|
| C(Fragment=1) | 3.07115  | -0.25151 | 1.53786  |
| H(Fragment=1) | 1.19233  | -1.00281 | 2.31818  |
| C(Fragment=1) | 3.84019  | -1.38858 | 1.97799  |
| C(Fragment=1) | 5.17572  | -1.46925 | 1.73057  |
| C(Fragment=1) | 5.86794  | -0.42316 | 1.02069  |
| H(Fragment=1) | 3.3064   | -2.18764 | 2.51128  |
| H(Fragment=1) | 5.74877  | -2.34115 | 2.06387  |
| C(Fragment=1) | 7.90792  | 0.56569  | 0.08971  |
| H(Fragment=1) | 8.98721  | 0.5227   | -0.09389 |
| C(Fragment=1) | 7.2729   | -0.47269 | 0.74166  |
| C(Fragment=1) | 8.13962  | -1.6094  | 1.14407  |
| O(Fragment=1) | 9.29288  | -1.57875 | 1.50948  |
| O(Fragment=1) | 7.50916  | -2.82746 | 1.02118  |
| H(Fragment=1) | 8.10754  | -3.58694 | 1.27111  |
| C(Fragment=1) | -7.0258  | 2.37505  | 1.9139   |
| O(Fragment=1) | -7.79637 | 1.47503  | 1.65301  |
| O(Fragment=1) | -7.51389 | 3.54676  | 2.43417  |
| H(Fragment=1) | -8.50482 | 3.51965  | 2.56226  |
| O(Fragment=1) | 5.48732  | 6.16006  | -2.30191 |
| H(Fragment=1) | 6.46737  | 6.0505   | -2.43127 |
| O(Fragment=1) | -3.53452 | 7.6803   | -1.25269 |
| H(Fragment=1) | -3.01308 | 8.39464  | -1.70309 |
| O(Fragment=1) | -1.9624  | -0.975   | 2.90847  |
| O(Fragment=2) | 0.4397   | -5.13295 | -2.67104 |
| O(Fragment=2) | -2.6376  | -0.16522 | -0.73023 |
| O(Fragment=2) | -2.15102 | -5.91134 | -2.12582 |
| O(Fragment=2) | -0.38655 | -6.79634 | -0.4899  |
| O(Fragment=2) | -4.57032 | -5.06479 | -2.01605 |
| O(Fragment=2) | 1.35453  | -3.20956 | 1.96652  |

|               |          |          |          |
|---------------|----------|----------|----------|
| O(Fragment=2) | -6.72187 | -4.4008  | -1.2179  |
| O(Fragment=2) | 2.14202  | -6.55204 | 1.98678  |
| N(Fragment=2) | 2.59096  | -3.66461 | -1.17311 |
| N(Fragment=2) | 0.00429  | -6.42104 | 2.74615  |
| C(Fragment=2) | 0.19944  | -3.11999 | -1.33034 |
| C(Fragment=2) | -2.06833 | -2.25514 | -1.8738  |
| C(Fragment=2) | -0.94482 | -2.23288 | -0.81853 |
| C(Fragment=2) | -0.25856 | -4.58204 | -1.55485 |
| C(Fragment=2) | 1.44674  | -3.03989 | -0.41709 |
| C(Fragment=2) | -3.11709 | -1.11195 | -1.70663 |
| C(Fragment=2) | -2.65397 | -3.6372  | -1.90187 |
| C(Fragment=2) | -1.75577 | -4.74619 | -1.93483 |
| C(Fragment=2) | 0.01567  | -5.52527 | -0.36529 |
| C(Fragment=2) | -4.487   | -1.52192 | -1.17267 |
| C(Fragment=2) | 1.16133  | -3.77174 | 0.9093   |
| C(Fragment=2) | -4.01928 | -3.86679 | -1.80739 |
| C(Fragment=2) | 0.6483   | -5.13874 | 0.77166  |
| C(Fragment=2) | -4.95448 | -2.8453  | -1.36163 |
| C(Fragment=2) | -3.33459 | -0.39222 | -3.0459  |
| C(Fragment=2) | -5.30409 | -0.56328 | -0.57799 |
| C(Fragment=2) | 3.28875  | -2.61891 | -1.9857  |
| C(Fragment=2) | 3.57613  | -4.3507  | -0.28613 |
| C(Fragment=2) | -6.29014 | -3.12935 | -0.99161 |
| C(Fragment=2) | 1.01991  | -6.08912 | 1.85938  |
| C(Fragment=2) | -6.61372 | -0.88353 | -0.1868  |
| C(Fragment=2) | -7.12367 | -2.15842 | -0.40555 |
| H(Fragment=2) | 0.50452  | -2.73934 | -2.34646 |
| H(Fragment=2) | -1.5879  | -2.09464 | -2.88149 |
| H(Fragment=2) | -0.58689 | -1.20129 | -0.63737 |

|               |          |          |          |
|---------------|----------|----------|----------|
| H(Fragment=2) | -1.32917 | -2.57468 | 0.16277  |
| H(Fragment=2) | 1.65012  | -1.96322 | -0.16655 |
| H(Fragment=2) | -2.39793 | -0.02365 | -3.4777  |
| H(Fragment=2) | -4.00271 | 0.47215  | -2.93044 |
| H(Fragment=2) | -3.79577 | -1.0573  | -3.78862 |
| H(Fragment=2) | 1.43249  | -4.98513 | -2.54199 |
| H(Fragment=2) | -1.99502 | 0.46079  | -1.12125 |
| H(Fragment=2) | -4.91107 | 0.44277  | -0.40908 |
| H(Fragment=2) | 2.57033  | -2.11974 | -2.65328 |
| H(Fragment=2) | 3.80637  | -1.84826 | -1.39212 |
| H(Fragment=2) | 4.03931  | -3.11334 | -2.62474 |
| H(Fragment=2) | 4.00414  | -3.72029 | 0.50767  |
| H(Fragment=2) | 3.11017  | -5.23834 | 0.19015  |
| H(Fragment=2) | 4.40802  | -4.73655 | -0.8969  |
| H(Fragment=2) | -0.88135 | -6.97502 | -1.38737 |
| H(Fragment=2) | -3.86133 | -5.80909 | -2.25135 |
| H(Fragment=2) | -7.24033 | -0.11789 | 0.29246  |
| H(Fragment=2) | -8.1439  | -2.40128 | -0.12239 |
| H(Fragment=2) | -0.9136  | -6.01999 | 2.69191  |
| H(Fragment=2) | 0.19053  | -7.03495 | 3.52268  |
| H(Fragment=2) | -7.6594  | -4.54262 | -0.91463 |

Stoichiometry C<sub>68</sub>H<sub>40</sub>N<sub>2</sub>O<sub>15</sub>

Framework group C1[X(C<sub>68</sub>H<sub>40</sub>N<sub>2</sub>O<sub>15</sub>)]

Deg. of freedom 369

Full point group C1 NOp 1

Largest Abelian subgroup C1 NOp 1

Largest concise Abelian subgroup C1 NOp 1

Standard orientation:

| -----  |        |        |                         |          |           |  |
|--------|--------|--------|-------------------------|----------|-----------|--|
| Center | Atomic | Atomic | Coordinates (Angstroms) |          |           |  |
| Number | Number | Type   | X                       | Y        | Z         |  |
| -----  |        |        |                         |          |           |  |
| 1      | 6      | 0      | -5.535782               | 4.627577 | 0.676353  |  |
| 2      | 6      | 0      | -4.846638               | 3.480676 | 1.117390  |  |
| 3      | 6      | 0      | -3.442374               | 3.380934 | 0.913496  |  |
| 4      | 6      | 0      | -2.753528               | 4.435592 | 0.247046  |  |
| 5      | 6      | 0      | -3.481192               | 5.571237 | -0.191653 |  |
| 6      | 6      | 0      | -4.865982               | 5.658143 | 0.034280  |  |
| 7      | 6      | 0      | -2.685187               | 2.232346 | 1.369863  |  |
| 8      | 6      | 0      | -1.328550               | 4.346892 | 0.016339  |  |
| 9      | 6      | 0      | -0.595425               | 3.219058 | 0.455705  |  |
| 10     | 6      | 0      | -1.294695               | 2.148722 | 1.148065  |  |
| 11     | 6      | 0      | 0.807768                | 3.145130 | 0.212880  |  |
| 12     | 6      | 0      | 1.460006                | 4.206912 | -0.467479 |  |
| 13     | 6      | 0      | 0.718434                | 5.322273 | -0.891625 |  |
| 14     | 6      | 0      | -0.655316               | 5.412906 | -0.662271 |  |
| 15     | 6      | 0      | -1.404277               | 6.566692 | -1.103589 |  |
| 16     | 6      | 0      | -2.744168               | 6.626690 | -0.870209 |  |
| 17     | 1      | 0      | -0.868394               | 7.362712 | -1.611207 |  |
| 18     | 1      | 0      | -6.610207               | 4.721529 | 0.858059  |  |
| 19     | 1      | 0      | -5.404529               | 6.549408 | -0.303237 |  |
| 20     | 1      | 0      | 1.227262                | 6.139031 | -1.410173 |  |
| 21     | 6      | 0      | -5.550534               | 2.376991 | 1.767146  |  |
| 22     | 6      | 0      | -4.883623               | 1.283170 | 2.223360  |  |
| 23     | 6      | 0      | -3.459421               | 1.181428 | 2.060117  |  |
| 24     | 1      | 0      | -5.397933               | 0.446142 | 2.709845  |  |
| 25     | 6      | 0      | -2.643908               | 0.173485 | 2.437859  |  |

|    |   |   |           |           |           |
|----|---|---|-----------|-----------|-----------|
| 26 | 6 | 0 | -1.267534 | 0.107546  | 2.220736  |
| 27 | 6 | 0 | -0.483517 | 1.001455  | 1.593992  |
| 28 | 6 | 0 | 1.582067  | 1.999547  | 0.655214  |
| 29 | 6 | 0 | 0.947338  | 0.922094  | 1.351267  |
| 30 | 6 | 0 | 2.965099  | 1.931482  | 0.407436  |
| 31 | 6 | 0 | 3.630729  | 3.011177  | -0.293121 |
| 32 | 6 | 0 | 2.900959  | 4.134035  | -0.724368 |
| 33 | 6 | 0 | 3.718855  | 0.797499  | 0.846652  |
| 34 | 6 | 0 | 5.039812  | 2.930113  | -0.540465 |
| 35 | 6 | 0 | 5.794842  | 1.777463  | -0.100422 |
| 36 | 6 | 0 | 5.137510  | 0.708240  | 0.590971  |
| 37 | 6 | 0 | 7.180662  | 1.708741  | -0.348940 |
| 38 | 6 | 0 | 7.836524  | 2.791373  | -1.038026 |
| 39 | 6 | 0 | 7.127175  | 3.877191  | -1.453434 |
| 40 | 6 | 0 | 5.712446  | 3.970378  | -1.215051 |
| 41 | 6 | 0 | 4.933714  | 5.094988  | -1.636595 |
| 42 | 6 | 0 | 3.573631  | 5.181327  | -1.404183 |
| 43 | 1 | 0 | 3.027154  | 6.063088  | -1.746130 |
| 44 | 1 | 0 | 8.910180  | 2.715991  | -1.213624 |
| 45 | 1 | 0 | 7.614473  | 4.702653  | -1.975565 |
| 46 | 6 | 0 | 1.677934  | -0.172448 | 1.784033  |
| 47 | 6 | 0 | 3.071148  | -0.251513 | 1.537858  |
| 48 | 1 | 0 | 1.192328  | -1.002811 | 2.318182  |
| 49 | 6 | 0 | 3.840185  | -1.388575 | 1.977992  |
| 50 | 6 | 0 | 5.175722  | -1.469247 | 1.730571  |
| 51 | 6 | 0 | 5.867938  | -0.423158 | 1.020690  |
| 52 | 1 | 0 | 3.306402  | -2.187644 | 2.511285  |
| 53 | 1 | 0 | 5.748765  | -2.341154 | 2.063874  |
| 54 | 6 | 0 | 7.907921  | 0.565685  | 0.089705  |

|    |   |   |           |           |           |
|----|---|---|-----------|-----------|-----------|
| 55 | 1 | 0 | 8.987214  | 0.522696  | -0.093887 |
| 56 | 6 | 0 | 7.272895  | -0.472688 | 0.741656  |
| 57 | 6 | 0 | 8.139620  | -1.609401 | 1.144075  |
| 58 | 8 | 0 | 9.292879  | -1.578745 | 1.509476  |
| 59 | 8 | 0 | 7.509157  | -2.827462 | 1.021183  |
| 60 | 1 | 0 | 8.107540  | -3.586935 | 1.271110  |
| 61 | 6 | 0 | -7.025795 | 2.375045  | 1.913903  |
| 62 | 8 | 0 | -7.796367 | 1.475029  | 1.653005  |
| 63 | 8 | 0 | -7.513890 | 3.546757  | 2.434169  |
| 64 | 1 | 0 | -8.504815 | 3.519653  | 2.562262  |
| 65 | 8 | 0 | 5.487320  | 6.160059  | -2.301910 |
| 66 | 1 | 0 | 6.467367  | 6.050504  | -2.431274 |
| 67 | 8 | 0 | -3.534516 | 7.680296  | -1.252691 |
| 68 | 1 | 0 | -3.013076 | 8.394639  | -1.703092 |
| 69 | 8 | 0 | -1.962404 | -0.974999 | 2.908474  |
| 70 | 8 | 0 | 0.439696  | -5.132955 | -2.671041 |
| 71 | 8 | 0 | -2.637600 | -0.165219 | -0.730230 |
| 72 | 8 | 0 | -2.151024 | -5.911336 | -2.125824 |
| 73 | 8 | 0 | -0.386548 | -6.796336 | -0.489903 |
| 74 | 8 | 0 | -4.570323 | -5.064793 | -2.016045 |
| 75 | 8 | 0 | 1.354534  | -3.209560 | 1.966520  |
| 76 | 8 | 0 | -6.721870 | -4.400803 | -1.217896 |
| 77 | 8 | 0 | 2.142015  | -6.552040 | 1.986784  |
| 78 | 7 | 0 | 2.590958  | -3.664607 | -1.173114 |
| 79 | 7 | 0 | 0.004291  | -6.421040 | 2.746153  |
| 80 | 6 | 0 | 0.199437  | -3.119988 | -1.330341 |
| 81 | 6 | 0 | -2.068330 | -2.255141 | -1.873802 |
| 82 | 6 | 0 | -0.944823 | -2.232876 | -0.818534 |
| 83 | 6 | 0 | -0.258555 | -4.582039 | -1.554848 |

|     |   |   |           |           |           |
|-----|---|---|-----------|-----------|-----------|
| 84  | 6 | 0 | 1.446739  | -3.039887 | -0.417091 |
| 85  | 6 | 0 | -3.117086 | -1.111953 | -1.706628 |
| 86  | 6 | 0 | -2.653968 | -3.637198 | -1.901874 |
| 87  | 6 | 0 | -1.755772 | -4.746193 | -1.934825 |
| 88  | 6 | 0 | 0.015672  | -5.525266 | -0.365286 |
| 89  | 6 | 0 | -4.487005 | -1.521922 | -1.172670 |
| 90  | 6 | 0 | 1.161327  | -3.771735 | 0.909296  |
| 91  | 6 | 0 | -4.019278 | -3.866788 | -1.807389 |
| 92  | 6 | 0 | 0.648304  | -5.138744 | 0.771664  |
| 93  | 6 | 0 | -4.954483 | -2.845304 | -1.361631 |
| 94  | 6 | 0 | -3.334593 | -0.392224 | -3.045900 |
| 95  | 6 | 0 | -5.304085 | -0.563282 | -0.577986 |
| 96  | 6 | 0 | 3.288748  | -2.618908 | -1.985698 |
| 97  | 6 | 0 | 3.576125  | -4.350701 | -0.286126 |
| 98  | 6 | 0 | -6.290138 | -3.129354 | -0.991609 |
| 99  | 6 | 0 | 1.019912  | -6.089120 | 1.859377  |
| 100 | 6 | 0 | -6.613720 | -0.883527 | -0.186802 |
| 101 | 6 | 0 | -7.123673 | -2.158423 | -0.405545 |
| 102 | 1 | 0 | 0.504518  | -2.739343 | -2.346462 |
| 103 | 1 | 0 | -1.587896 | -2.094640 | -2.881489 |
| 104 | 1 | 0 | -0.586887 | -1.201286 | -0.637370 |
| 105 | 1 | 0 | -1.329174 | -2.574683 | 0.162771  |
| 106 | 1 | 0 | 1.650117  | -1.963223 | -0.166551 |
| 107 | 1 | 0 | -2.397934 | -0.023653 | -3.477703 |
| 108 | 1 | 0 | -4.002710 | 0.472154  | -2.930444 |
| 109 | 1 | 0 | -3.795766 | -1.057301 | -3.788623 |
| 110 | 1 | 0 | 1.432494  | -4.985127 | -2.541991 |
| 111 | 1 | 0 | -1.995022 | 0.460789  | -1.121246 |
| 112 | 1 | 0 | -4.911067 | 0.442774  | -0.409082 |

|     |   |   |           |           |           |
|-----|---|---|-----------|-----------|-----------|
| 113 | 1 | 0 | 2.570325  | -2.119745 | -2.653277 |
| 114 | 1 | 0 | 3.806374  | -1.848258 | -1.392119 |
| 115 | 1 | 0 | 4.039306  | -3.113341 | -2.624735 |
| 116 | 1 | 0 | 4.004139  | -3.720286 | 0.507667  |
| 117 | 1 | 0 | 3.110173  | -5.238344 | 0.190147  |
| 118 | 1 | 0 | 4.408016  | -4.736548 | -0.896896 |
| 119 | 1 | 0 | -0.881346 | -6.975016 | -1.387365 |
| 120 | 1 | 0 | -3.861333 | -5.809093 | -2.251345 |
| 121 | 1 | 0 | -7.240333 | -0.117889 | 0.292463  |
| 122 | 1 | 0 | -8.143903 | -2.401280 | -0.122385 |
| 123 | 1 | 0 | -0.913604 | -6.019994 | 2.691911  |
| 124 | 1 | 0 | 0.190529  | -7.034952 | 3.522684  |
| 125 | 1 | 0 | -7.659397 | -4.542615 | -0.914625 |

-----

Gaussian 16: ES64L-G16RevA.03 25-Dec-2016

9-May-2021

\*\*\*\*\*

%chk=TETRACICLINA\_QUITOSANE\_wb97xd\_2.chk

%nprocshared=32

Will use up to 32 processors via shared memory.

%mem=15GB

-----

# wb97xd/6-311g(2d,p) counterpoise=2

-----

1/38=1,62=2,172=1/1;

2/12=2,17=6,18=5,40=1/2;

1/38=1,53=2,62=2,63=1/22;

3/5=4,6=6,7=102,11=2,25=1,30=1,74=-58/1,2,3;



4//1;

5/5=2,38=5/2;

6/7=2,8=2,9=2,10=2,28=1/1;

1/53=2,62=2,63=1/22;

3/5=7,6=11,7=102,11=2,25=1,30=1,74=-58,82=7/1,2,3;

4//1;

5/5=2,38=5/2;

6/7=2,8=2,9=2,10=2,28=1/1;

1/53=2,62=2,63=1/22(-4);

99/5=1,9=1/99;

-----

tetraciclina\_quitosano\_CP

-----

Symbolic Z-matrix:

Charge = 0 Multiplicity = 1 in supermolecule

Charge = 0 Multiplicity = 1 in fragment 1.

Charge = 0 Multiplicity = 1 in fragment 2.

|               |         |          |          |
|---------------|---------|----------|----------|
| C(Fragment=2) | 1.8026  | -2.12165 | 3.45552  |
| C(Fragment=2) | 1.79167 | -0.87555 | 2.57799  |
| C(Fragment=2) | 2.55965 | -1.20268 | 1.30494  |
| C(Fragment=2) | 1.98231 | -3.50168 | 1.39404  |
| C(Fragment=2) | 1.22763 | -3.30736 | 2.7038   |
| H(Fragment=2) | 0.75389 | -0.66513 | 2.30355  |
| H(Fragment=2) | 2.84751 | -2.36127 | 3.71926  |
| H(Fragment=2) | 3.02477 | -3.77835 | 1.6075   |
| H(Fragment=2) | 0.17494 | -3.09805 | 2.471    |
| H(Fragment=2) | 3.60871 | -1.4342  | 1.54482  |
| C(Fragment=2) | 3.01958 | 0.51328  | -1.7743  |
| C(Fragment=2) | 4.82044 | 1.98772  | -2.21987 |

|               |         |          |          |
|---------------|---------|----------|----------|
| C(Fragment=2) | 5.53336 | 1.58185  | -0.92672 |
| C(Fragment=2) | 4.5146  | 1.14753  | 0.11905  |
| C(Fragment=2) | 3.60404 | 0.07299  | -0.43635 |
| H(Fragment=2) | 2.34027 | 1.35998  | -1.59102 |
| H(Fragment=2) | 6.16579 | 0.71646  | -1.16151 |
| H(Fragment=2) | 3.87407 | 2.01219  | 0.36629  |
| H(Fragment=2) | 4.15905 | -0.86383 | -0.55743 |
| H(Fragment=2) | 4.18784 | 2.87081  | -2.04352 |
| O(Fragment=2) | 1.97106 | -2.29057 | 0.63509  |
| O(Fragment=2) | 2.50803 | -0.11572 | 0.43808  |
| O(Fragment=2) | 4.03142 | 0.91028  | -2.6799  |
| O(Fragment=2) | 5.70014 | 2.34328  | -3.22546 |
| H(Fragment=2) | 6.18954 | 1.5545   | -3.47743 |
| O(Fragment=2) | 5.15024 | 0.67502  | 1.2811   |
| H(Fragment=2) | 5.91289 | 1.2539   | 1.40838  |
| C(Fragment=2) | 1.34583 | -4.55196 | 0.50557  |
| H(Fragment=2) | 0.27744 | -4.3239  | 0.40814  |
| H(Fragment=2) | 1.44648 | -5.52846 | 0.97709  |
| C(Fragment=2) | 2.22637 | -0.58825 | -2.44096 |
| H(Fragment=2) | 2.92254 | -1.36218 | -2.79063 |
| H(Fragment=2) | 1.55582 | -1.03887 | -1.70895 |
| O(Fragment=2) | 1.42796 | -0.09574 | -3.49003 |
| H(Fragment=2) | 2.00659 | 0.326    | -4.13    |
| O(Fragment=2) | 1.98027 | -4.61134 | -0.75576 |
| H(Fragment=2) | 2.09434 | -3.70004 | -1.0394  |
| O(Fragment=2) | 1.35567 | -4.49949 | 3.44552  |
| H(Fragment=2) | 0.96474 | -4.33103 | 4.30665  |
| O(Fragment=2) | 1.0485  | -1.91746 | 4.62287  |
| H(Fragment=2) | 1.27471 | -1.0257  | 4.9155   |

|               |          |          |          |
|---------------|----------|----------|----------|
| N(Fragment=2) | 2.29896  | 0.25942  | 3.33104  |
| H(Fragment=2) | 1.94754  | 1.11842  | 2.9233   |
| H(Fragment=2) | 3.3124   | 0.29811  | 3.27613  |
| N(Fragment=2) | 6.38007  | 2.60284  | -0.33196 |
| H(Fragment=2) | 7.14791  | 2.82721  | -0.953   |
| H(Fragment=2) | 5.85257  | 3.46162  | -0.2049  |
| O(Fragment=1) | -2.79897 | -0.65323 | -3.25676 |
| O(Fragment=1) | 0.93531  | 2.03971  | 1.15014  |
| O(Fragment=1) | -3.9302  | 1.67465  | -2.46591 |
| O(Fragment=1) | -5.00234 | -0.49331 | -1.4346  |
| O(Fragment=1) | -3.87073 | 3.6642   | -0.9512  |
| O(Fragment=1) | -1.90289 | -2.99166 | 1.05041  |
| O(Fragment=1) | -4.31966 | 4.92695  | 1.21495  |
| O(Fragment=1) | -5.8796  | -2.52414 | 0.12492  |
| N(Fragment=1) | -1.54722 | -2.93444 | -2.25719 |
| N(Fragment=1) | -4.49603 | -2.7809  | 1.89308  |
| C(Fragment=1) | -1.27271 | -0.63346 | -1.36926 |
| C(Fragment=1) | -0.74312 | 1.64694  | -0.60346 |
| C(Fragment=1) | -0.83091 | 0.19305  | -0.15797 |
| C(Fragment=1) | -2.65024 | -0.24814 | -1.91622 |
| C(Fragment=1) | -1.24706 | -2.12831 | -1.05779 |
| C(Fragment=1) | -0.05842 | 2.65552  | 0.35255  |
| C(Fragment=1) | -2.10776 | 2.10968  | -1.04425 |
| C(Fragment=1) | -2.90617 | 1.27294  | -1.87918 |
| C(Fragment=1) | -3.80083 | -0.90456 | -1.11676 |
| C(Fragment=1) | -1.03031 | 3.33899  | 1.29427  |
| C(Fragment=1) | -2.2573  | -2.36999 | 0.058    |
| C(Fragment=1) | -2.74834 | 3.19395  | -0.46935 |
| C(Fragment=1) | -3.60315 | -1.85663 | -0.15701 |

|               |          |          |          |
|---------------|----------|----------|----------|
| C(Fragment=1) | -2.28678 | 3.74093  | 0.81133  |
| C(Fragment=1) | 0.60585  | 3.75855  | -0.48944 |
| C(Fragment=1) | -0.62359 | 3.66842  | 2.57404  |
| C(Fragment=1) | -0.37131 | -3.02032 | -3.12019 |
| C(Fragment=1) | -2.01349 | -4.2802  | -1.93575 |
| C(Fragment=1) | -3.11132 | 4.51992  | 1.64709  |
| C(Fragment=1) | -4.7737  | -2.42138 | 0.60846  |
| C(Fragment=1) | -1.45534 | 4.41861  | 3.39005  |
| C(Fragment=1) | -2.68074 | 4.85026  | 2.92958  |
| H(Fragment=1) | -0.57632 | -0.42063 | -2.18407 |
| H(Fragment=1) | -0.10679 | 1.64174  | -1.49965 |
| H(Fragment=1) | 0.13575  | -0.19034 | 0.16433  |
| H(Fragment=1) | -1.52219 | 0.09132  | 0.68386  |
| H(Fragment=1) | -0.26869 | -2.39864 | -0.63928 |
| H(Fragment=1) | 1.37854  | 3.31975  | -1.12705 |
| H(Fragment=1) | 1.06847  | 4.49586  | 0.16766  |
| H(Fragment=1) | -0.11901 | 4.26355  | -1.13111 |
| H(Fragment=1) | -2.58119 | -1.60535 | -3.23421 |
| H(Fragment=1) | 1.40192  | 1.34794  | 0.66388  |
| H(Fragment=1) | 0.34461  | 3.34376  | 2.92394  |
| H(Fragment=1) | -0.03066 | -2.02892 | -3.41764 |
| H(Fragment=1) | 0.45079  | -3.55802 | -2.62416 |
| H(Fragment=1) | -0.63523 | -3.56613 | -4.02743 |
| H(Fragment=1) | -1.27989 | -4.84546 | -1.34353 |
| H(Fragment=1) | -2.95615 | -4.23938 | -1.39044 |
| H(Fragment=1) | -2.19184 | -4.81812 | -2.86747 |
| H(Fragment=1) | -4.92068 | 0.25191  | -2.06458 |
| H(Fragment=1) | -4.11155 | 3.08541  | -1.72336 |
| H(Fragment=1) | -1.14016 | 4.67629  | 4.39413  |

H(Fragment=1)    -3.32853   5.44392   3.5667  
H(Fragment=1)    -3.52962 -2.96471   2.12611  
H(Fragment=1)    -5.21631 -3.32158   2.34369  
H(Fragment=1)    -4.75982   5.39362   1.92887

Stoichiometry   C34H48N4O17

Framework group   C1[X(C34H48N4O17)]

Deg. of freedom   303

Full point group            C1    NOp   1

Largest Abelian subgroup    C1    NOp   1

Largest concise Abelian subgroup C1    NOp   1

Standard orientation:

| -----  |        |        |                         |           |           |  |
|--------|--------|--------|-------------------------|-----------|-----------|--|
| Center | Atomic | Atomic | Coordinates (Angstroms) |           |           |  |
| Number | Number | Type   | X                       | Y         | Z         |  |
| -----  |        |        |                         |           |           |  |
| 1      | 6      | 0      | 1.802598                | -2.121648 | 3.455520  |  |
| 2      | 6      | 0      | 1.791669                | -0.875548 | 2.577990  |  |
| 3      | 6      | 0      | 2.559650                | -1.202677 | 1.304935  |  |
| 4      | 6      | 0      | 1.982313                | -3.501676 | 1.394037  |  |
| 5      | 6      | 0      | 1.227631                | -3.307360 | 2.703796  |  |
| 6      | 1      | 0      | 0.753892                | -0.665130 | 2.303550  |  |
| 7      | 1      | 0      | 2.847508                | -2.361270 | 3.719259  |  |
| 8      | 1      | 0      | 3.024775                | -3.778354 | 1.607500  |  |
| 9      | 1      | 0      | 0.174944                | -3.098054 | 2.471002  |  |
| 10     | 1      | 0      | 3.608710                | -1.434200 | 1.544824  |  |
| 11     | 6      | 0      | 3.019577                | 0.513277  | -1.774304 |  |
| 12     | 6      | 0      | 4.820441                | 1.987717  | -2.219872 |  |
| 13     | 6      | 0      | 5.533361                | 1.581850  | -0.926724 |  |

|    |   |   |          |           |           |
|----|---|---|----------|-----------|-----------|
| 14 | 6 | 0 | 4.514603 | 1.147530  | 0.119046  |
| 15 | 6 | 0 | 3.604042 | 0.072987  | -0.436350 |
| 16 | 1 | 0 | 2.340273 | 1.359984  | -1.591016 |
| 17 | 1 | 0 | 6.165792 | 0.716455  | -1.161514 |
| 18 | 1 | 0 | 3.874065 | 2.012190  | 0.366286  |
| 19 | 1 | 0 | 4.159054 | -0.863827 | -0.557427 |
| 20 | 1 | 0 | 4.187842 | 2.870809  | -2.043521 |
| 21 | 8 | 0 | 1.971060 | -2.290567 | 0.635089  |
| 22 | 8 | 0 | 2.508025 | -0.115719 | 0.438081  |
| 23 | 8 | 0 | 4.031418 | 0.910280  | -2.679901 |
| 24 | 8 | 0 | 5.700136 | 2.343281  | -3.225461 |
| 25 | 1 | 0 | 6.189540 | 1.554501  | -3.477427 |
| 26 | 8 | 0 | 5.150235 | 0.675018  | 1.281099  |
| 27 | 1 | 0 | 5.912886 | 1.253903  | 1.408376  |
| 28 | 6 | 0 | 1.345828 | -4.551963 | 0.505573  |
| 29 | 1 | 0 | 0.277444 | -4.323899 | 0.408141  |
| 30 | 1 | 0 | 1.446476 | -5.528464 | 0.977093  |
| 31 | 6 | 0 | 2.226371 | -0.588249 | -2.440963 |
| 32 | 1 | 0 | 2.922536 | -1.362183 | -2.790633 |
| 33 | 1 | 0 | 1.555820 | -1.038866 | -1.708947 |
| 34 | 8 | 0 | 1.427964 | -0.095743 | -3.490028 |
| 35 | 1 | 0 | 2.006587 | 0.326000  | -4.130003 |
| 36 | 8 | 0 | 1.980270 | -4.611342 | -0.755759 |
| 37 | 1 | 0 | 2.094337 | -3.700043 | -1.039401 |
| 38 | 8 | 0 | 1.355669 | -4.499493 | 3.445518  |
| 39 | 1 | 0 | 0.964735 | -4.331030 | 4.306648  |
| 40 | 8 | 0 | 1.048503 | -1.917456 | 4.622866  |
| 41 | 1 | 0 | 1.274712 | -1.025697 | 4.915495  |
| 42 | 7 | 0 | 2.298960 | 0.259418  | 3.331037  |

|    |   |   |           |           |           |
|----|---|---|-----------|-----------|-----------|
| 43 | 1 | 0 | 1.947542  | 1.118416  | 2.923301  |
| 44 | 1 | 0 | 3.312399  | 0.298106  | 3.276128  |
| 45 | 7 | 0 | 6.380068  | 2.602838  | -0.331959 |
| 46 | 1 | 0 | 7.147914  | 2.827208  | -0.953001 |
| 47 | 1 | 0 | 5.852565  | 3.461617  | -0.204901 |
| 48 | 8 | 0 | -2.798969 | -0.653225 | -3.256761 |
| 49 | 8 | 0 | 0.935307  | 2.039711  | 1.150144  |
| 50 | 8 | 0 | -3.930201 | 1.674652  | -2.465909 |
| 51 | 8 | 0 | -5.002342 | -0.493305 | -1.434602 |
| 52 | 8 | 0 | -3.870732 | 3.664201  | -0.951200 |
| 53 | 8 | 0 | -1.902893 | -2.991659 | 1.050412  |
| 54 | 8 | 0 | -4.319661 | 4.926950  | 1.214951  |
| 55 | 8 | 0 | -5.879601 | -2.524144 | 0.124922  |
| 56 | 7 | 0 | -1.547216 | -2.934441 | -2.257192 |
| 57 | 7 | 0 | -4.496026 | -2.780898 | 1.893081  |
| 58 | 6 | 0 | -1.272710 | -0.633458 | -1.369257 |
| 59 | 6 | 0 | -0.743120 | 1.646938  | -0.603455 |
| 60 | 6 | 0 | -0.830912 | 0.193049  | -0.157969 |
| 61 | 6 | 0 | -2.650243 | -0.248135 | -1.916217 |
| 62 | 6 | 0 | -1.247056 | -2.128309 | -1.057788 |
| 63 | 6 | 0 | -0.058416 | 2.655520  | 0.352547  |
| 64 | 6 | 0 | -2.107755 | 2.109676  | -1.044250 |
| 65 | 6 | 0 | -2.906167 | 1.272939  | -1.879183 |
| 66 | 6 | 0 | -3.800830 | -0.904555 | -1.116756 |
| 67 | 6 | 0 | -1.030314 | 3.338987  | 1.294273  |
| 68 | 6 | 0 | -2.257297 | -2.369992 | 0.058004  |
| 69 | 6 | 0 | -2.748339 | 3.193949  | -0.469351 |
| 70 | 6 | 0 | -3.603145 | -1.856633 | -0.157013 |
| 71 | 6 | 0 | -2.286783 | 3.740934  | 0.811334  |

|     |   |   |           |           |           |
|-----|---|---|-----------|-----------|-----------|
| 72  | 6 | 0 | 0.605849  | 3.758553  | -0.489441 |
| 73  | 6 | 0 | -0.623586 | 3.668424  | 2.574039  |
| 74  | 6 | 0 | -0.371305 | -3.020317 | -3.120193 |
| 75  | 6 | 0 | -2.013487 | -4.280201 | -1.935752 |
| 76  | 6 | 0 | -3.111325 | 4.519922  | 1.647085  |
| 77  | 6 | 0 | -4.773701 | -2.421383 | 0.608455  |
| 78  | 6 | 0 | -1.455343 | 4.418605  | 3.390045  |
| 79  | 6 | 0 | -2.680743 | 4.850260  | 2.929583  |
| 80  | 1 | 0 | -0.576316 | -0.420629 | -2.184066 |
| 81  | 1 | 0 | -0.106785 | 1.641742  | -1.499652 |
| 82  | 1 | 0 | 0.135752  | -0.190343 | 0.164331  |
| 83  | 1 | 0 | -1.522188 | 0.091317  | 0.683862  |
| 84  | 1 | 0 | -0.268690 | -2.398636 | -0.639278 |
| 85  | 1 | 0 | 1.378543  | 3.319750  | -1.127046 |
| 86  | 1 | 0 | 1.068469  | 4.495857  | 0.167662  |
| 87  | 1 | 0 | -0.119007 | 4.263554  | -1.131112 |
| 88  | 1 | 0 | -2.581186 | -1.605351 | -3.234206 |
| 89  | 1 | 0 | 1.401915  | 1.347940  | 0.663875  |
| 90  | 1 | 0 | 0.344608  | 3.343758  | 2.923936  |
| 91  | 1 | 0 | -0.030664 | -2.028917 | -3.417641 |
| 92  | 1 | 0 | 0.450792  | -3.558016 | -2.624162 |
| 93  | 1 | 0 | -0.635229 | -3.566134 | -4.027430 |
| 94  | 1 | 0 | -1.279888 | -4.845457 | -1.343533 |
| 95  | 1 | 0 | -2.956147 | -4.239379 | -1.390440 |
| 96  | 1 | 0 | -2.191840 | -4.818117 | -2.867470 |
| 97  | 1 | 0 | -4.920676 | 0.251912  | -2.064576 |
| 98  | 1 | 0 | -4.111549 | 3.085407  | -1.723364 |
| 99  | 1 | 0 | -1.140156 | 4.676288  | 4.394132  |
| 100 | 1 | 0 | -3.328527 | 5.443924  | 3.566698  |



|     |   |   |           |           |          |
|-----|---|---|-----------|-----------|----------|
| 101 | 1 | 0 | -3.529620 | -2.964713 | 2.126110 |
| 102 | 1 | 0 | -5.216305 | -3.321575 | 2.343685 |
| 103 | 1 | 0 | -4.759815 | 5.393620  | 1.928867 |

-----
